# Supplementary material for: Biofortified indica rice attains iron and zinc nutrition dietary targets in the field
Source: PubMed Central journal article supplement (PMC4726380; doi:10.1038/srep19792), 2016-01-25
Supplement: srep19792-s1.pdf [file srep19792-s1.pdf]

Biofortified indica rice attains iron and zinc nutrition dietary targets in the field

**Author names:** Kurniawan R. Trijatmiko<sup>a,j</sup>, Conrado Dueñas Jr.<sup>a</sup>, Nikolaos Tsakirpaloglou<sup>a</sup>, Lina Torrizo<sup>a</sup>, Felichi Mae Arines<sup>a</sup>, Cheryl Adeva<sup>a</sup>, Jeanette Balindong<sup>a</sup>, Norman Oliva<sup>a</sup>, Maria V. Sapasap<sup>a</sup>, Jaime Borrero<sup>b</sup>, Jessica Rey<sup>a</sup>, Perigio Francisco<sup>a</sup>, Andy Nelson<sup>c,d</sup>, Hiromi Nakanishi<sup>e</sup>, Enzo Lombi<sup>f</sup>, Elad Tako<sup>g</sup>, Raymond P. Glahn<sup>g</sup>, James Stangoulis<sup>h</sup>, Prabhjit Chadha-Mohanty<sup>a</sup>, Alexander A. T. Johnson<sup>i</sup>, Joe Tohme<sup>b</sup>, Gerard Barry<sup>a</sup>, Inez H. Slamet-Loedin<sup>a,k,\*</sup>

**Author affiliations:**

<sup>a</sup>Plant Breeding, Genetics, and Biotechnology Division, International Rice Research Institute, DAPO Box 7777, Metro Manila, Philippines

<sup>b</sup>Centro Internacional de Agricultura Tropical, Cali, Colombia

<sup>c</sup>Social Sciences Division, International Rice Research Institute, DAPO Box 7777, Metro Manila, Philippines

<sup>d</sup>Faculty of Geo-Information and Earth Observation (ITC), University of Twente, Enschede 7500 AE, The Netherlands

<sup>e</sup>Department of Global Agricultural Sciences, Graduate School of Agricultural and Life Sciences, The University of Tokyo, 1-1-1 Yayoi, Bunkyo-ku, Tokyo 113-8657 Japan

<sup>f</sup>Centre for Environmental Risk Assessment and Remediation, University of South Australia, Australia

<sup>g</sup>United States Department of Agriculture-Agricultural Research Service, Robert W. Holley Center for Agriculture and Health, Cornell University, New York

<sup>h</sup>School of Biological Sciences, Flinders University of South Australia, Adelaide, Australia

<sup>i</sup>School of Botany, The University of Melbourne, Victoria 3010, Australia

<sup>j</sup>Indonesian Center for Agricultural Biotechnology and Genetic Resources Research and Development, Bogor 16111, Indonesia

<sup>k</sup>Research Center for Biotechnology, Indonesian Institute of Sciences, Cibinong 16911, Indonesia

\*To whom correspondence should be addressed. E-mail: i.slamet-loedin@irri.org

**Supplementary Figure S1 Prevalence of micronutrient deficiency, high rice consumption and poverty; an unequivocal overlap is observed among all these areas. (a)** Anaemia prevalence in children by country based on haemoglobin concentration<sup>2</sup>. Data are for 2011. **(b)** Annual per capita consumption of milled rice by country. Data from FAOSTAT Food Supply Data Online Database and USDA Production Supply and Distribution Online Database. Data are for 2011 (FAOSTAT) and 2013 (USDA). **(c)** Percentage of the population living on less than \$1.25 a day at 2005 international prices. Data from World Bank, Development Research Group. Data are for the most recent year of primary household survey data obtained from government statistical agencies and World Bank country departments. All maps were generated using the ArcGIS 10.0 ((c) ESRI) GIS software.

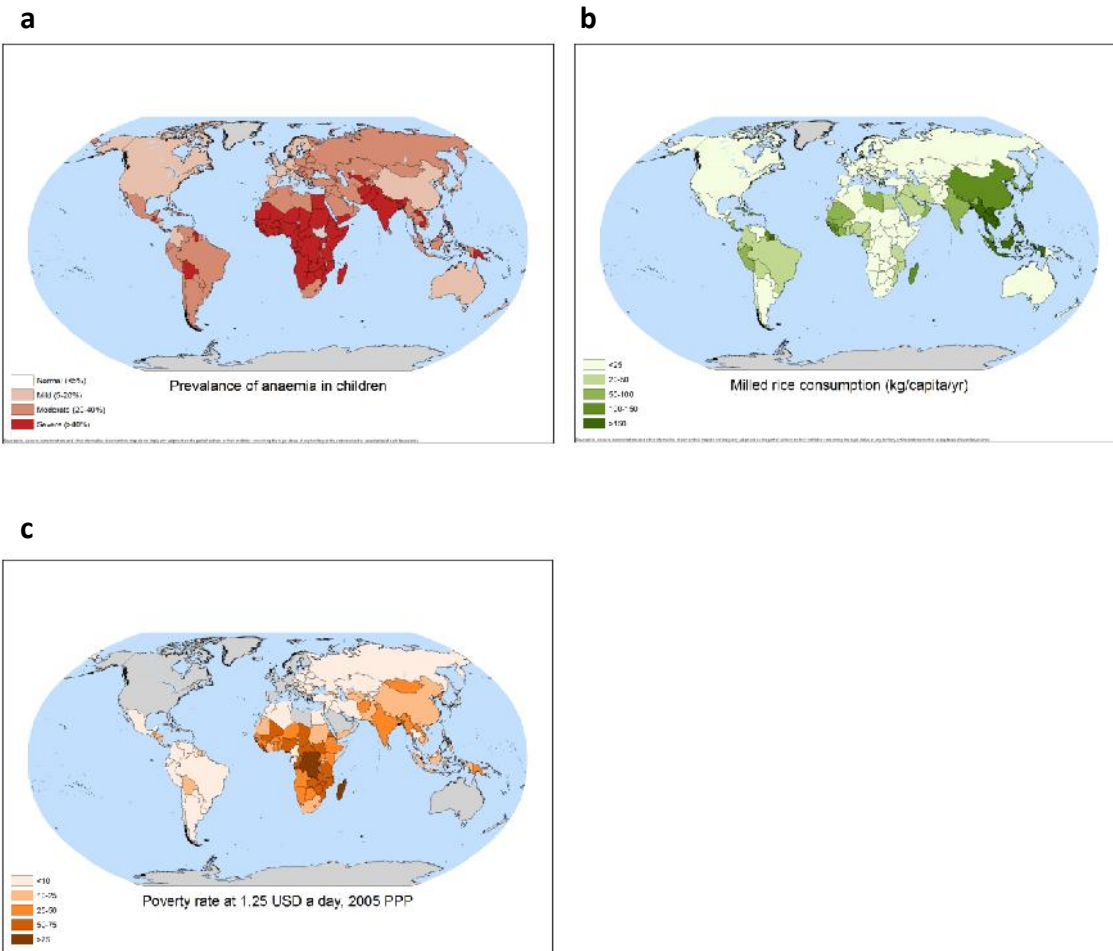

**Supplementary Figure S2** PCR-based assay for zygosity test of the lead events. **(a and c)** Schematic diagram of PCR-based assay using three oligonucleotides, P1, P2, and P3, for zygosity test for the -234 **(a)** or -274 **(c)** insertion. **(b and d)** Zygosity test on genomic DNA from a non-transformed plant (WT control), plants hemizygous for the -234 **(b)** or -274 **(d)** insertion, and plants homozygous for the -234 **(b)** or -274 **(d)** insertion or null control. One kb plus DNA ladder was used as size standard.

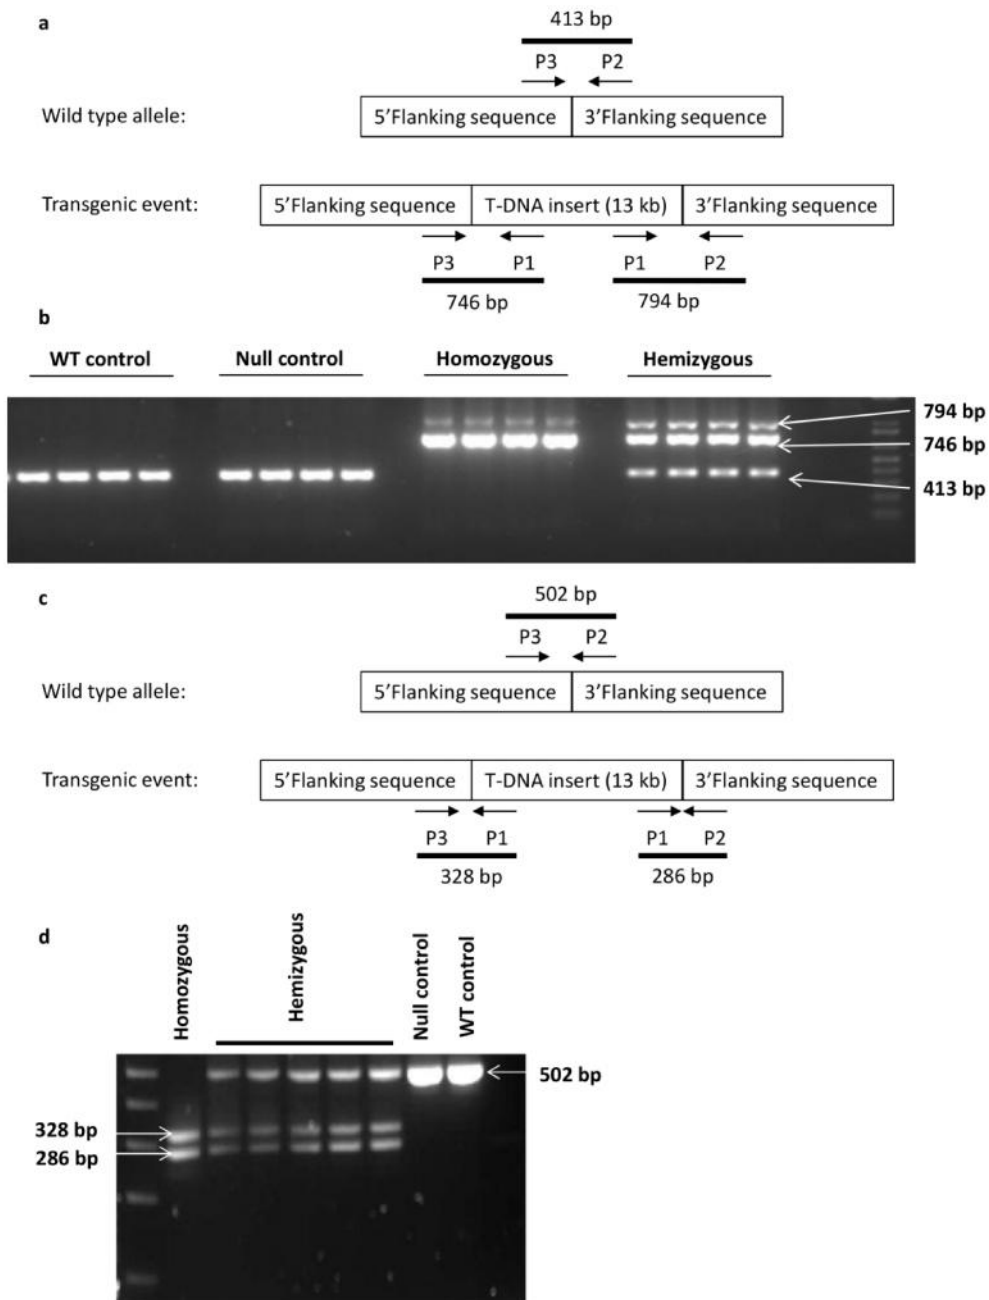

**Supplementary Figure S3** Relative quantification of endogenous *OsNAAT1* (a) and *OsDMAS1* (b). T<sub>2</sub> homozygous plants were cultivated in pots under greenhouse conditions. Total RNA was extracted from vegetative-stage leaves from each line (n = 2). Bars represent the means  $\pm$  s.d. of two biological replicates, each with three technical replicates of real-time RT-PCR.

**a**

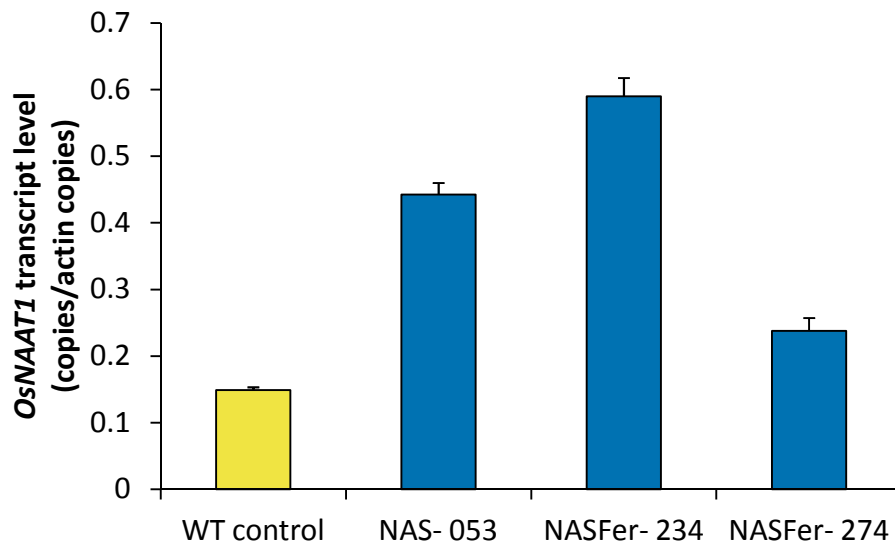

**b**

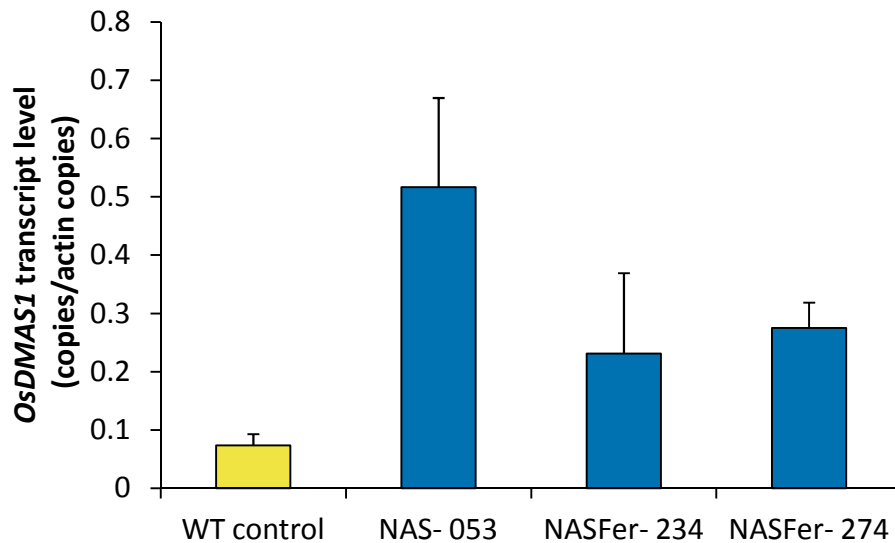

**Supplementary Figure S4** Field trials for evaluation of target trait and agronomic characters of lead events at IRRI Philippines. A represents WT control, B represents NASFer-274, C represents Null-274.

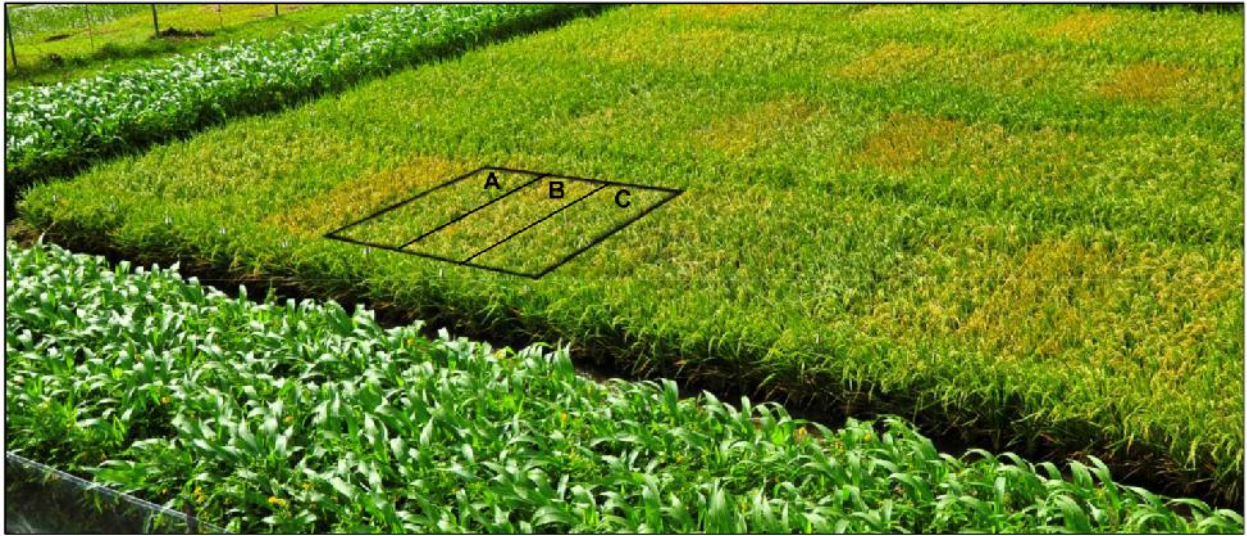

**Supplementary Figure S5** Microscopy images of polished rice showing the absence of bran.

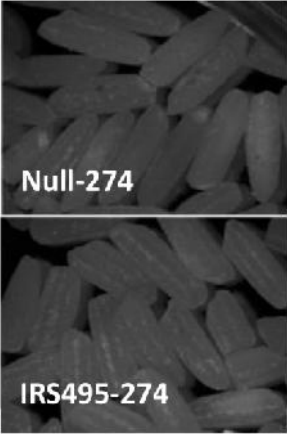

**Supplementary Figure S6** Flanking sequences and position of T-DNA integration in event NASFer-234. **(a)** Rice genome sequence upstream of the T-DNA. **(b)** Rice genome sequence downstream of the T-DNA. Green and black sections indicate rice genome and T-DNA insert sequences, respectively. Alignment to the draft genome sequence of IR64 was done at a specialized deployment of Galaxy at the International Rice Research Institute (<http://175.41.147.71:8080/>). Left Border repeat was deleted during T-DNA integration in both cases **(c)** Position of T-DNA integration in the second exon of a gene encoding hypothetical protein on chromosome 6. Manual annotation was done using the gene prediction program FGENESH with the *Oryza\_indica* rice training set ([www.softberry.com](http://www.softberry.com)). Brown and blue sections indicate exon and intron, respectively. The section with green highlight represents nucleotides deleted during T-DNA integration.

**a**

*IR64 draft1:scaffold\_745 position 13,264↓*

AGCGAGCGAGAGAGGAATTAAGGCAGCGGGATGGCGCGATTTGTGGGGATGCGGCGGCGGTGGCGACGGCAAGGATC  
*filler DNA* *Left Border region*  
TGGATTTTTTAAACAAATTGACG**CATTGCGGACGTTTTTAATGTACTGAATTAACGCCGAATTAATTCGGGGATCT**  
GGATTTTAGTACTGGATTTTGGTTTTAGGAATTAGAAATTTTATTGATAGAAGTATTTTACAAATACAAATACATAC  
TAAGGGTTTCTTATATGCTCAACACATGAGCGAAACCCTATAGGAACCCTAATTCCTTATCTGGGAACTACTCACA  
**CATTATTATGGAGAAACTCGAGC**TTGTTCGATCGACAGATCCCGGTTCGGCATCTACTCTATTTCTTTGCCCTCGGACG  
AGTGCTGGGGCGTCGGTTTTCCACTATCGGCGAGTACTTCTACACAGCCATCGGTCCAGACGGCCGCGCTTCTGCGGG  
CGATTTGTGTACGCCGACAGTCCCGGCTCCGGATCGGACGATTGCGTTCGCATCGACCCTGCGCCCAAGCTGCATCA  
TCGAAATTGCCGTCAACCAAGCTCTGATAGAGTTGGTCAAGACCAATGCGGAGCATATACGCCCGGAGTCGTGGCGA  
TCCTGCAAGCTCCGGATGCCTCCGCTCGAAGTAGCGCGTCTGCTGCTCCATACAAGCCAACCACGGCCTCCAGAAGA  
AGATGTTGGCGACCTCGTAT

**b**

ATACGAGGTGCGCCAACATCTTCTTCTGGAGGCCGTGGTTGGCTTGTATGGAGCAGCAGACGCGCTACTTCGAGCGGA  
GGCATCCGGAGCTTGCAGGATCGCCACGACTCCGGGCGTATATGCTCCGCATTGGTCTTGACCAACTCTATCAGAGC  
TTGGTTGACGGCAATTTTCGATGATGCAGCTTGGGCGCAGGGTCGATGCGACGCAATCGTCCGATCCGGAGCCGGGAC  
TGTCGGGCGTACACAAATCGCCCGCAGAAGCGCGGCCGTCTGGACCGATGGCTGTGTAGAAGTACTCGCCGATAGTG  
GAAACCGACGCCCCAGCACTCGTCCGAGGGCAAAGAAATAGAGTAGATGCCGACCGGGATCTGTGATCGACAAGCT  
CGAGTTTCTCCATAATAATGTGTGAGTAGTTCCAGATAAGGGAATTAGGGTTCCTATAGGGTTTCGCTCATGTGTT  
GAGCATATAAGAAACCCTTAGTATGTATTTGTATTTGTAAAATACTTCTATCAATAAAATTTCTAATTCCTAAAACC  
*Left Border region*  
AAAATCCAGTACTAAAATCCAGATCCCCGAATTAATTCGGCGTTAATTCAGTACATTAAAAACGTCCGCAATGTGT  
*filler DNA* ↓*IR64 draft1:scaffold\_745 position 13,307*  
TATTAAGTTGTGAGAGAATGCGCGTTCTGAGAGAGGAGGGGAGAGCCGGAGAGGTGCGTGCGGATGGGACGGGAGAG  
AGGAAACGTGGGACTTTCTGAGGCGTTGGATGAGATGATTCTGGATCGTCAATTTTTTTTTTTTTTTTGAATTACA  
CGGTACAACGCAGACACTCACAACGCACGCGCACTCACCCCTATGAACACACGCATGCAA



**c**

**Start codon**

ATGGGAGCGAATTTTTTCAGGATTTAACGGCGTTGTGCTTTTCAGTGGTAGGCGATGTACCCGTCGACAGCGAGGCGTC  
TGTGGTGATTTTCGTCAATCTCTCCAGAATTTGTGGCCAGTCTTCAAAGATGCTCATAGGGGTAGGGTTTGCATGC  
GTGTGTTTCATAGGGGTGAGTGC GCGTGC GTTGTGAGTGTCTGCGTTGTACCGTGTAATTC TAAAAAAAAAAAAAAAAAAT  
TCGACGATCCAGAATCATCTCATCCAACGCCTCAGAAAGTCCCACGTTTCCTCTCTCCCGTCCCATCCGCACGCACC  
TCTCCGGCTCTCCCCTCTCTCTCAGAACGCGCATTCCCTCATCTCTCGGTGCGTCCCCTCGACCCGCCCGCATCC  
É T-DNA integration  
ACGATCCTTGCCGTCGCCACCGCCGCCGCATCCCCACAAATCGCGCCATCCCGCTGCCTTAATTCCTCTCTCGCTCG  
É  
CTCCCCCTCAACCGCTGCCGCTGCCGCTGCCGCTGCCGCGCCTCCGCATCCCTAATCCACTCCGCGCCGTCTCCTA  
CGCCGGTCGAGATCTCCGCCATCGTCGCCACGCACAGCCACCTGAGCCTCTCTTCCCGTCCCCTTGTGCCCTTCCAT  
GTCCTCTTCTTTCTCCCTCTCTCTCTATCTTGATCGAACCTAGGTCTCGCGGTGTGGCTCTCCCGGAGCAAGCGA  
GCCAGCATGGCAGAGTCGATCCGCGTCATCATGGAGGTGGGCGCCGACGGCGTCATGCTATGCTCGTTACCCTCTGC  
AACCCGCCGGTCAATGTGCTGCATCCATTAGTAAACCCTCCTCGCTTTCTTAATCTCGATTTTATTTTTTTGCCCA  
TCTCTTGGTGTTGGGGTTTTTGGTGTGCTGGTCACTGATTCCATGCACGGGTTTGGATTTTGTCTCCCATGCGTGC  
TGCAGTCATCCAGGGGCTCAAGGAGAAGTACGCGGAGGCATGGATCGCGACGAAGTCAAGGCAATCGTGCTCACC GG  
TGAGGCCTCCCGATAATTGTTTTACCCCCCTCCCTACGAAAATTGATCAGAGAATTCATTACCTATACACA ACTG  
AAATATCTGATTTGTTTATTGCGGCAGCCGTGCAATTTGCGCTCATTTTGTACTGATAGATTGCTGTACGGGTTGAC  
GTAAGATGAGCAGCATTTTTTGTGTTTTGCTGGTTTTTTCGAGTGGTTGTGGAGTAGTCGCTGCTATCCAATCATT A  
TGTGCTGATCTCAGTCAACTAGGTTAATGAGTGGGCTGCTCCTGCTGTACAAGATTTGCTTTGCTGGTGGTCTAGAA  
CTGTAGTGGAGCTGCTCAACTGTAAATGGCAAATGTTGGATGCTAATCCAGTTATCTCACTAAAGTAGAACTACAG  
CAATGGCAAGTTATATATAAACCTTGATCAGAAAGGAACACAATTTTGTACAGGTCCCCAAGGAGATCTGTTTTCTT  
CAAACATTCTTTCTATTAATGGGTAGGAAATAGCTTTTCTGGTAACTTTTGGTTGAAATGTGCCGTTGTACATTTT  
AGGAATGCAAGAGTGAGAAAGGGGATTGTAAATTTTAGTTTATCATACTTGTTGTTTTTTCTTCTAAATTATGTTCAA  
TCCTTGCTAGATACTGGAGGCAAATTTTGTGGAGGCTTTAATATCAATGTGTTTACAGAAGCTCACAAGACTGGTTA  
ATGGTCCTGTCATCGACTCGTGGCCTCTGTCCCCGACACCTGCCCGAGTCGCCGCCTCTGTCCCTCAACACCACCC  
AGACCTCCACCGACTCCATCCGTGTCTGCATCATCGGCTGCAATCTAG

**Supplementary Figure S7** Flanking sequences and position of T-DNA integration in event NASFer-274. **(a)** Rice genome sequence upstream of the T-DNA. **(b)** Rice genome sequence downstream of the T-DNA. Green and black sections indicate rice genome and T-DNA insert sequences, respectively. **(c)** Position of T-DNA integration in the 3'UTR of LOC\_Os03g55720. Brown, blue, and black sections indicate coding sequence, UTR, and intergenic region, respectively. The section with blue highlight represents nucleotides deleted during T-DNA integration.

**a**

*Rice chromosome 3 position 32,576,511*↓  
 TCGATTAATAAATTTGCTTTTCGTTTTGTACCCATGACGATTGGTGATATATTGTGGTGTAAACAAATTGACGCTTAGAC  
*Left Border*  
 AACTTAATAACACATTGCGGACGTTTTTAATGTACTGAATTAACGCCGAATTAATTCGGGGGATCTGGATTTTAGTA  
 CTG

**b**

CTGGCAAACCTGTGATGGACGACACCGTCAGTGCCTCCGTCGCGCAGGCTCTCGATGAGCTGATGCTTTGGGCCGAGG  
 ACTGCCCCGAAGTCCGGCACCTCGTGCACGCGGATTTCCGGCTCCAACAATGTCTGACGGACAATGGCCGCATAACA  
 GCGGTCATTGACTGGAGCGAGGCGATGTTCCGGGATTCCCAATACGAGGTCGCCAACATCTTCTTCTGGAGGCCGTG  
 GTTGGCTTGTATGGAGCAGCAGACGCGCTACTTCGAGCGGAGGCATCCGGAGCTTGCAGGATCGCCACGACTCCGGG  
 CGTATATGCTCCGCATTGGTCTTGACCAACTCTATCAGAGCTTGGTTGACGGCAATTTTCGATGATGCAGCTTGGGCG  
 CAGGGTCGATGCGACGCAATCGTCCGATCCGGAGCCGGGACTGTCCGGCGTACACAAATCGCCCGCAGAAGCGCGGC  
 CGTCTGGACCGATGGCTGTGTAGAAGTACTCGCCGATAGTGGAAACCGACGCCCCAGCACTCGTCCGAGGGCAAAGA  
 AATAGAGTAGATGCCGACCGGGATCTGTGATCGACAAGCTCGAGTTTCTCCATAATAATGTGTGAGTAGTTCCAG  
 ATAAGGGAATTAGGGTTCCTATAGGGTTTTCGCTCATGTGTTGAGCATATAAGAAACCCTTAGTATGTATTTGTATTT  
 GTAAAATACTTCTATCAATAAAAATTTCTAATTCCTAAAACCAAATCCAGTACTAAAATCCAGATCCCCCGAATTAA  
*Left Border*  
 TTCGGCGTTAATTCAGTACATTAATAAACGTCGCAATGTGTTATTAAGTTGTCTAAGCGTCAATTTGTTTACACCAC  
*filler DNA*     ↓*Rice chromosome 3 position 32,576,534*  
AATATACATTAAAAACGGTTAGCGTTTTGGAGGCAGAACCTGCAAATGCAATTGGTTTTTTCAGCTGTACACATTGC  
 GGACTTGCTACGGTCTGTCCAATTTCTTCCAGAGTTTACTTCGGTTTTGAAACATTCAAAAAACCAGAATGATCA  
 CATCATCACCATCATTTCATCAGCACTGAATCATGTTTAGTGTACTCACTTTCCATAAACTGATGACAAAACCTGAAT  
 GTTATAGGCTTTTCATTTTAGATGATGCCATGCGGTTGACAGAAGAA

c

→ 5'UTR of LOC\_Os03g55720  
ATCCATTCCGCCGGCGCCTTATCCTACCCTCATCTCCCGTACAAAACCCACTCCCTCCCTCCCGCTCCCAACCTGAC  
CCTTCCAACCCCCCTGCGCCATTGCCGGCCACACTCCTCTTCTCCTCCATCGCCAAGAACCACCACGAGGTAGG  
CAAACCACCCTCATGGAGATGGATTTCTGTCGTTCTGAGCTGCAACATTGCTTGATCTCATCGTTGGTTTTCTTGCA  
← ÉStart codon of LOC\_Os03g55720  
GCAATGGCGTCTGCTGTCCATGGCCACAACGCTGCCGTGCTGGCCGGCGCCGCACCGGCGGCGAGGAAGAGGAGCGG  
CGTGACGTACGTGGAGGGGATGAACGCGTACAGCGGGCTCAAGGCGCTCAACAAGGTGACCCTGCTCGGCGTGCGCA  
AGACCGCCGACTACTCGTTTCGCCAAGGTGGTGGCCAAGCTGAGCCCCGCCGGCGGGAAGAGCCGCGGCGGCGGTTTC  
GGGGCGCAGTGCAACGCCGCCGGTGAGATATTCAGGATCGCCGTATCATGAACGGGCTCGTGCTCGTCCGCGTCCG  
CGTCCGGCTTCGTGCTGCTCCGGGTGGAGGCGGCCGTGAGGAGTCGGAGTAGTGGACCCCGATCGAGCCATAGCAGG  
CAGGGCCCAGCCAGCCATGGCTGGTTGGCCCCGATAAGCCGTGATATATAACTGTGATGTATGTTTTCGATTAAAATT  
É T-DNA integration É  
TGTTTTCGTTTTGTACCCATGACGATTGGTCAATACCTTTCGAACGAAACACGTTTTGGAGGCAGAACCTGCAAATG  
←  
CAATTGGTTTTTTCAGCTGTACACATTGCCGACTTGCTACGGTCTGTCCAATTCTTCTTCCAGAGTTTACTTCGGTTT  
→ 3'UTR of LOC\_Os03g55730  
TGAAACATTCAAAAAACCAGAATGATCACATCATCACCATCATTATCAGCACTGAATCATGTTTAGTGTACTCACT  
TTCCATAAACTGATGACAAAACCTGAATGTTATAGGCTTTTCATTTTAGATGATGCCATGCGGTTGACAGAAGAAGCA  
CAGCAGGGGCAAAATATACTTTTAGTTCAATGCCTATAAGAGCTGTTAACAATGGCAACTCACTGGAGCATGTGTTT  
CTCCACTAAAACCTTACAGAAAAGGATTCTAAATAATAAGTTCTATGATCGAACCCCGAGAAAAGATAGTGTCAAGG  
CTGAAAAGGCGCATCTAATTCTGTGGAAGTACAACAGGAGCCATCTCAGGAGCGTGAATCTCCGGCAATTTGCAAA  
← ÉStop codon of LOC\_Os03g55730  
CTCATTCCTTACATTGGTCTCTGACAAGCTGAGAACAGCTGCCAGCTGATGAAAGCCATGACCAGTGAGGAGAACAG  
CTCGAAGCCAACCACCTTTGGAGTCTGCCACTCTAATGATCTCCTCAAGTAACTGCATGTTTAGCACAGTGAAGAAG

**Supplementary Figure S8** Histochemical X-Gluc staining of longitudinal sections of *prGluA2::GUS* transgenic rice seeds at 7, 12, 17, and 30 days after flowering (DAF).

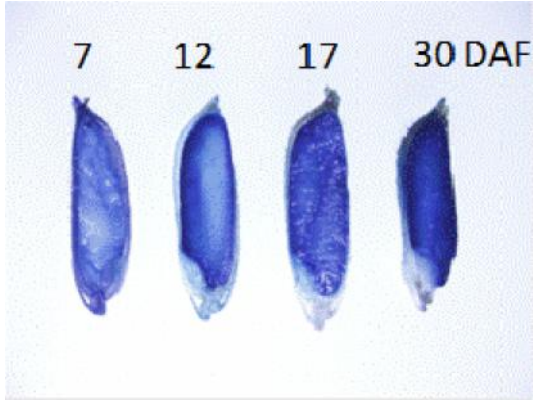

**Supplementary Table S1** Overview on generated transgenic T<sub>0</sub> lines transformed with seven constructs and color image analysis for Fe in rice grains for each construct.

| Construct ID    | Description of the cassette                     | No. of events | Percentage of events (%)   |                 |              |
|-----------------|-------------------------------------------------|---------------|----------------------------|-----------------|--------------|
|                 |                                                 |               | High staining <sup>a</sup> | Medium staining | Low staining |
| IRS429          | prUbi::OsNAS2::tNOS                             | 254           | 2                          | 17              | 81           |
| IRS433 (NAS)    | pr35S::OsNAS2::tNOS                             | 158           | 4                          | 11              | 85           |
| IRS461          | prGluB1:: OsNAS2::tNOS                          | 220           | 2                          | 47              | 51           |
| IRS489          | prGluB1::SFerH-1::tNOS                          | 228           | 0                          | 38              | 62           |
| IRS491 (Fer)    | prGluA2:: SFerH-1::tNOS                         | 188           | 32                         | 26              | 42           |
| IRS493          | pr35S::OsNAS2::tNOS+<br>prGluB1::SFerH-1::tNOS  | 295           | 13                         | 81              | 6            |
| IRS495 (NASFer) | pr35S::OsNAS2::tNOS+<br>prGluA2:: SFerH-1::tNOS | 346           | 89                         | 11              | 0            |
|                 | <b>Total</b>                                    | <b>1,689</b>  | 142                        | 231             | 327          |

<sup>a</sup>Based on mean gray value (relative to that of the untransformed IR64 control) of scanned Prussian blue-stained seeds analyzed with ImageJ (see Methods). Low staining: 120-130%, Medium staining: 131-140%, High staining: >140%.

**Supplementary Table S2** Fe concentration in polished seeds of selected events from 3 selected constructs.

| <b>Construct</b>   | <b>No. of events</b> | <b>No. of selected events</b> | <b>No. of single-insert events</b> | <b>Selected event designation</b> | <b>Fe concentration of homozygous polished grains (<math>\mu\text{g g}^{-1}</math> DW)</b> | <b>Beyond T-DNA border transfer</b> |
|--------------------|----------------------|-------------------------------|------------------------------------|-----------------------------------|--------------------------------------------------------------------------------------------|-------------------------------------|
| IRS495<br>(NASFer) | 346                  | 33                            | 12                                 | NASFer-199                        | 8.7                                                                                        | Yes                                 |
|                    |                      |                               |                                    | NASFer-234                        | 11.7                                                                                       | No                                  |
|                    |                      |                               |                                    | NASFer-238                        | 10.0                                                                                       | Yes                                 |
|                    |                      |                               |                                    | NASFer-274                        | 15.0                                                                                       | No                                  |
|                    |                      |                               |                                    | NASFer-296                        | 5.5                                                                                        | No                                  |
| IRS491<br>(Fer)    | 178                  | 26                            | 13                                 | Fer-85                            | 8.8                                                                                        | No                                  |
|                    |                      |                               |                                    | Fer-98                            | 8.0                                                                                        | No                                  |
|                    |                      |                               |                                    | Fer-113                           | 7.4                                                                                        | No                                  |
|                    |                      |                               |                                    | Fer-137                           | 8.3                                                                                        | No                                  |
|                    |                      |                               |                                    | Fer-168                           | 7.1                                                                                        | No                                  |
| IRS433<br>(NAS)    | 158                  | 23                            | 1                                  | NAS-53                            | 8.2                                                                                        | No                                  |

**Supplementary Table S3** Grain quality of non-transformed IR64, event NASFer-274, and null from event NASFer-274 grown in the confined field trial.

| Line       | Grain quality parameters |             |             |                     |                      |                     |
|------------|--------------------------|-------------|-------------|---------------------|----------------------|---------------------|
|            | Chalkiness (%)           | Length (mm) | Width (mm)  | Amylose content (%) | Gel consistency (mm) | Protein content (%) |
| NASFer-274 | 1.3 ± 0.6 <sup>a</sup>   | 6.23 ± 0.01 | 1.92 ± 0.01 | 27.7 ± 0.3          | 100 ± 0.0            | 10.4 ± 0.2          |
| Null-274   | 0.7 ± 0.6                | 6.30 ± 0.02 | 1.92 ± 0.01 | 27.0 ± 0.5          | 89 ± 6.1             | 11.0 ± 0.3          |
| IR64-WT    | 3.7 ± 1.2                | 6.33 ± 0.01 | 1.89 ± 0.02 | 23.4 ± 0.3          | 100 ± 0.0            | 10.5 ± 0.2          |

<sup>a</sup>Values are means ± s.d., n = 3

**Supplementary Table S4** Metal concentrations of T<sub>3</sub> polished grains of events NASFer-234 and NASFer-274 and their nulls grown in the confined field trials.

| Location             | Event      | Fe ( $\mu\text{g g}^{-1}$ ) | Zn ( $\mu\text{g g}^{-1}$ ) | P ( $\mu\text{g g}^{-1}$ ) | S ( $\mu\text{g g}^{-1}$ ) | Cd ( $\mu\text{g g}^{-1}$ ) | Pb ( $\mu\text{g g}^{-1}$ ) | As ( $\mu\text{g g}^{-1}$ ) |
|----------------------|------------|-----------------------------|-----------------------------|----------------------------|----------------------------|-----------------------------|-----------------------------|-----------------------------|
| CIAT-<br>Colombia    | NASFer-234 | 14.7 $\pm$ 0.5 <sup>a</sup> | 53.8 $\pm$ 5.4              | 1803.3 $\pm$ 136.5         | 1453.3 $\pm$ 80.8          | < 0.1 <sup>b</sup>          | < 1 <sup>c</sup>            | < 1 <sup>d</sup>            |
|                      | Null-234   | 2.9 $\pm$ 0.2               | 16.5 $\pm$ 1.4              | 1460.0 $\pm$ 110.0         | 1256.7 $\pm$ 56.9          | < 0.1                       | < 1                         | < 1                         |
|                      | NASFer-274 | 15.0 $\pm$ 0.4              | 45.7 $\pm$ 1.8              | 1505.0 $\pm$ 21.2          | 1365.0 $\pm$ 49.5          | < 0.1                       | < 1                         | < 1                         |
|                      | Null-274   | 4.2 $\pm$ 0.4               | 16.6 $\pm$ 1.2              | 1735.0 $\pm$ 106.1         | 1380.0 $\pm$ 56.6          | < 0.1                       | < 1                         | < 1                         |
|                      | IR64-WT    | 2.5 $\pm$ 0.0               | 14.2 $\pm$ 0.4              | 1326.7 $\pm$ 20.8          | 1153.3 $\pm$ 20.8          | < 0.1                       | < 1                         | < 1                         |
| IRRI-<br>Philippines | NASFer-234 | 13.2 $\pm$ 0.9              | 44.7 $\pm$ 2.0              | 1575.0 $\pm$ 149.3         | 1442.5 $\pm$ 41.1          | < 0.1                       | < 1                         | < 1                         |
|                      | Null-234   | 2.9 $\pm$ 0.4               | 17.3 $\pm$ 1.4              | 1500.0 $\pm$ 112.0         | 1295.0 $\pm$ 40.4          | < 0.1                       | < 1                         | < 1                         |
|                      | NASFer-274 | 14.6 $\pm$ 1.2              | 49.0 $\pm$ 2.3              | 1725.0 $\pm$ 167.0         | 1455.0 $\pm$ 85.4          | < 0.1                       | < 1                         | < 1                         |
|                      | Null-274   | 3.4 $\pm$ 0.4               | 19.2 $\pm$ 1.2              | 1805.0 $\pm$ 67.6          | 1377.5 $\pm$ 134.5         | < 0.1                       | < 1                         | < 1                         |
|                      | IR64-WT    | 2.6 $\pm$ 0.2               | 16.2 $\pm$ 1.9              | 1327.5 $\pm$ 80.6          | 1167.5 $\pm$ 116.2         | < 0.1                       | < 1                         | < 1                         |

<sup>a</sup>Values are means  $\pm$  s.d., n = 3

<sup>b</sup>Detection limit for Cd concentration using ICP is 0.1  $\mu\text{g g}^{-1}$

<sup>c</sup>Detection limit for Pb concentration using ICP is 1  $\mu\text{g g}^{-1}$

<sup>d</sup>Detection limit for As concentration using ICP is 1  $\mu\text{g g}^{-1}$



**Supplementary Table S5** Ferritin concentrations in Caco-2 cells exposed to samples of rice digests.

| Sample tested              | Caco-2 cell ferritin (ng/mg of total protein <sup>a</sup> ) | Increased ferritin amount (ng/mg of total protein <sup>b</sup> ) |
|----------------------------|-------------------------------------------------------------|------------------------------------------------------------------|
| Cell baseline              | 1.85 ± 0.18                                                 | 0                                                                |
| NASFer-274                 | 6.14 ± 1.00                                                 | 4.29                                                             |
| NASFer-234                 | 8.77 ± 1.13                                                 | 6.92                                                             |
| IR64 wild type             | 2.54 ± 0.49                                                 | 0.69                                                             |
| NASFer-274+AA <sup>c</sup> | 18.76 ± 2.00                                                | 18.66                                                            |
| NASFer-234+AA              | 26.27 ± 2.41                                                | 26.17                                                            |
| IR64 wild type+AA          | 4.44 ± 0.15                                                 | 4.34                                                             |

<sup>a</sup>Values are means ± s.d., n = 3

<sup>b</sup>Values are normalized to the cell baseline

<sup>c</sup>Ascorbic acid (AA) is added to the sample

**Supplementary Table S6** Chemical properties of soil at IRRI CFT.

|                                     |                           |
|-------------------------------------|---------------------------|
| Chemical property                   |                           |
| pH                                  | 5.65 ± 0.071 <sup>a</sup> |
| Organic C %                         | 1.22 ± 0.106              |
| Available K (meq/100g)              | 0.83 ± 0.021              |
| Available P-B (ppm)                 | 9.10 ± 0.424              |
| Available P-O (ppm)                 | 15.50 ± 0.707             |
| Cation exchange capacity (meq/100g) | 39.20 ± 1.131             |
| Active Fe (%)                       | 1.68 ± 0.262              |
| Available Zn (ppm)                  | 0.45 ± 0.099              |
| Clay H %                            | 57 ± 0                    |
| Sand H %                            | 10 ± 0                    |
| Silt H %                            | 33 ± 0                    |

<sup>a</sup>Values are means ± s.d., n = 2

**Supplementary Table S7** Chemical properties of soil at CIAT CFT.

|                                    |                     |
|------------------------------------|---------------------|
| Chemical property                  |                     |
| pH                                 | $7.85 \pm 0.0371^a$ |
| Organic matter (g/kg)              | $17.99 \pm 1.279$   |
| P (mg/kg)                          | $299.80 \pm 59.419$ |
| K (cmol/kg)                        | $0.84 \pm 0.063$    |
| Ca (cmol/kg)                       | $17.60 \pm 1.436$   |
| Mg (cmol/kg)                       | $6.29 \pm 0.900$    |
| Na (cmol/kg)                       | $0.31 \pm 0.010$    |
| Cation exchange capacity (cmol/kg) | $18.06 \pm 1.552$   |
| S (mg/kg)                          | $22.58 \pm 12.368$  |
| B (mg/kg)                          | $0.60 \pm 0.157$    |
| Cu (mg/kg)                         | $0.94 \pm 0.645$    |
| Fe (mg/kg)                         | $4.84 \pm 3.840$    |
| Mn (mg/kg)                         | $87.39 \pm 34.530$  |
| Zn (mg/kg)                         | $6.22 \pm 3.293$    |

<sup>a</sup>Values are means  $\pm$  s.d., n = 5

**Supplementary Table S8** Primers for confirmation of T-DNA inverted repeat configuration in event NASFer-274.

| No | Primer name             | Sequence (5'–3')              | Amplicon size (bp) |
|----|-------------------------|-------------------------------|--------------------|
| 1  | prGluA2-F               | GCAAGCTTGTTAATCATGGGTAGGCAACC | 4,664              |
|    | 274-upstream flanking   | TTCTTCTGTCAACCGCATGG          |                    |
| 2  | SferH1-RT-F             | CTTGCTGTTCCAACCTGCTCC         | 3,517              |
|    | 274-upstream flanking   | TTCTTCTGTCAACCGCATGG          |                    |
| 3  | tNOS-F                  | GATCGTTCAAACATTTGGCA          | 2,877              |
|    | 274-upstream flanking   | TTCTTCTGTCAACCGCATGG          |                    |
| 4  | prGluA2-F               | GCAAGCTTGTTAATCATGGGTAGGCAACC | 4,622              |
|    | 274-downstream flanking | GGATCGCCGTCATCATGAAC          |                    |
| 5  | SferH1-RT-F             | CTTGCTGTTCCAACCTGCTCC         | 3,475              |
|    | 274-downstream flanking | GGATCGCCGTCATCATGAAC          |                    |
| 6  | tNOS-F                  | GATCGTTCAAACATTTGGCA          | 2,835              |
|    | 274-downstream flanking | GGATCGCCGTCATCATGAAC          |                    |

## Supplementary Methods

**Generation of plant transformation vectors and transgenic rice.** Fragments encompassing the full-length coding regions were amplified (using KAPA Hifi DNA Polymerase Hotstart) from young soybean leaf cDNA (for *SferH-1*) or rice genomic DNA (*OsNAS2*, LOC\_Os03g19420). Soybean cv. PHI29924 and rice cv. Nipponbare were used. Oligonucleotides SferH1-F (5'-gcggatccCACAAATCTTAGCCGCCATT-3') and SferH1-R (5'-gcggtaccCCAGAATTCAGAAAAGACCAAATG-3') were used to amplify *SferH-1*, whereas oligonucleotides OsNAS2-F: 5'-GAGAGAggatccATGGAGGCTCAGAACCAAGA-3' and OsNAS2-R:5'-GAGAGAggtaccTCAGACGGATAGCCTCTTGG-3'<sup>24</sup> were used to amplify *OsNAS2*. Both pairs of oligonucleotides introduced *Bam*HI and *Kpn*I restriction sites (indicated in lower case) to the amplified fragments at their 5' and 3', respectively. The oligonucleotides pr35S-F: 5'-GAGAGAaagcttCATGGAGTCAAAGATTCAAA-3' and pr35S-R:5'-GAGAGAggatccAGTCCCCGTGTTCTCTCCA-3' were used to amplify a 538-bp fragment of the CaMV 35S promoter from pCAMBIA1301. The oligonucleotides prGluA2-F: 5'-GCaagcttGTTAATCATGGTGTAGGCAACC-3' and prGluA2-R: 5'-GCg gatccGTTGTTGTAGGACTAATGAACTGAATG-3' were used to amplify a 839-bp GluA-2 promoter<sup>31</sup> from rice cv. Nipponbare genomic DNA. Both pairs of oligonucleotides introduced *Hind*III and *Bam*HI restriction sites (indicated in lower case) to the amplified fragments at their 5' and 3', respectively. In all cases, fragments were introduced to the pCR4Blunt-TOPO vector as described by the manufacturer (Life Technologies) and subsequently sequenced from both sides. After digestion, fragments (promoter and gene) with appropriate compatible cohesive ends were ligated in between the *Hind*III and *Kpn*I sites of pCAMBIA1300int-tNOS (provided by

Emmanuel Guiderdoni, CIRAD, France) to create the plant transformation vector pCAMBIA1300int-pr35S-OsNAS2-tNOS (IRS433) and pCAMBIA1300int-prGluA2-SferH1-tNOS (IRS491). To generate the two-cassette construct, the oligonucleotides 35S-OsNAS2-HF (5'-GCaagcttCATGGAGTCAAAGATTCAAATAGA-3') and 35S-OsNAS2-HR (5'-GCaagcttCCGATCTAGTAACATAGATGACACC-3') were used to amplify the pr35S-OsNAS2-tNOS cassette from IRS433. The pair of oligonucleotides introduced the *Hind*III restriction site (indicated in lower case) to the amplified fragment at its 5' and 3', which was used to ligate the cassette to the *Hind*III site in IRS491 to create pCAMBIA1300int-pr35S-OsNAS2-tNOS-prGluA2-SferH1-tNOS (IRS495). For generating the promoter:GUS construct, the *GUS* gene was amplified from pCAMBIA-1301 (CAMBIA, Australia) and used to replace *SferH-1* gene in the IRS491, to create pCAMBIA1300int-prGluA2-GUS-tNOS. Transformation of indica rice cv. IR64 was performed using an immature embryo as previously described<sup>50</sup>. Transgenic plants were grown in a greenhouse. The presence of a transgene in the transformants was confirmed by PCR using the primer pair pr35S-F and pr35S-R for IRS433, GluA2-SferH1-F (5'-GAACAACACAATGCTGCGTC-3') and GluA2-SferH1-R (5'-GCTCGCTCTTCTTAACCTCC-3') for IRS491, and OsNAS2-GluA2-F (5'-CAAGTGCTGCAAGATGGAGG-3') and OsNAS2-GluA2-R (5'-AGGCTCATCGAGGATACACG-3') for IRS495.

**Selection of construct based on color image analysis for Fe.** A semi-quantitative analysis of Fe concentration<sup>51</sup> with brief modifications was performed on brown seeds for the mass screening of the generated transgenic events. Ten T<sub>1</sub> seeds from each T<sub>0</sub> transgenic line were dehusked to obtain brown seeds. The seeds were placed in a 24-well flat-bottom plate containing water and vacuum infiltrated. A 1-mm cross section was made in the middle part of each seed using a

ceramic knife. The cross sections were soaked in 2% HCl and 2% potassium hexacyanoferrate (II) trihydrate for 1 h. After six times washing with water, the staining was intensified with 0.3% (v/v) H<sub>2</sub>O<sub>2</sub> in methanol. The cross sections were rinsed six times with water and kept in 70% ethanol. For embedding, the 70% ethanol was removed and a warm suspension of 0.75% agarose was added to the well. The sections were arranged close to each other before the agarose solidified. The plates were scanned using a color scanner (ApeosPort-IV C3370), and saved as a TIFF file with 600 dpi resolution. The TIFF file was converted into an HSB file and the intensities of the blue staining of each event were quantified using ImageJ software.

**Selection of events from selected constructs using Fe staining on polished seeds.** T<sub>1</sub> seeds from each T<sub>0</sub> transgenic event of IRS433, IRS491 and IRS495 were dehusked to obtain brown seeds. To polish the seeds, 30 brown seeds were placed into 2-mL tubes. The 2-mL tubes were subsequently placed in a Cryo-Block for 48 Microcentrifuge (SPEX SamplePrep) and shaken vigorously for 2 min at 1,200 strokes per min for 70 cycles using a 2000 Geno/Grinder (SPEX SamplePrep). Three polished seeds of each T<sub>0</sub> plant were cut transversely across the middle plane of the grain by a ceramic knife. Then, the samples were soaked in 2% HCl and 2% potassium hexacyanoferrate (II) trihydrate for 2 h. Stained samples were washed with distilled water and observed by stereoscopic microscope (SZX7 of Olympus Corp.).

**T-DNA flanking sequence recovery.** Genomic sequences flanking the T-DNA left border were cloned using inverse PCR or TAIL-PCR as previously described<sup>58-60</sup>. For inverse PCR, genomic DNA (1 µg) obtained from each event was digested with *TaqI*, self-ligated with T4 DNA ligase (Invitrogen), ethanol-precipitated, digested with *ApoI*, and then amplified by nested PCR with

the following primer sets: IPCR1-F (5'-CAGTACTAAAATCCAGATCCCCCGAAT-3') and IPCR1-R (5'-TTATATGCTCAACACATGAGCGAAACC-3'); IPCR2-F (5'-ACGTCCGCAATGTGTTATTAAGTTGTC-3') and IPCR2-R (5'-AACCTAATCCCTTATCTGGGAACTA-3'). These sets were used in the first and second rounds of PCR, respectively. For TAIL-PCR, genomic DNA (50 ng) obtained from each event was amplified using left-border-specific primer LB1 (5'-CAGTACTAAAATCCAGATCCCCCGAAT-3') in combination with AD1, AD2, AD3, or AD4 primer<sup>61</sup> with thermal conditions for primary amplification as previously described<sup>60</sup>. Secondary amplification was performed as previously described<sup>60</sup> using 1 µL of the primary amplification product as a template with the nested left-border-specific primer LB2 (5'-ACGTCCGCAATGTGTTATTAAGTTGTC-3') and the same AD primer. DNA of the non-transformed plant was used as a control. Transgenic event-specific amplification products were excised from the agarose, purified using GeneClean Kit II (QBiogene), cloned into pGEM-T Easy (Promega), and sequenced. Identification of the insert position in the rice genome was performed using a BlastN algorithm<sup>55</sup> at the National Center for Biotechnology Information ([www.ncbi.nlm.nih.gov](http://www.ncbi.nlm.nih.gov)).

**Amplification and sequencing for confirmation of T-DNA inverted repeat configuration in event IRS495-274.** A primer that is complementary to a genetic element within T-DNA insert was paired with either primer that is complementary to the upstream flanking sequence or primer that is complementary to the downstream flanking sequence to amplify genomic DNA of a homozygous T<sub>1</sub> NASFer-274 line using the Expand Long Template PCR System (Roche) with non-transformed IR64 as a negative control. PCR was performed in a 20-µL volume containing 1xExpand Long Template buffer 1, 350 µM of each dNTP, 300 nM of each primer, 200 ng of



DNA template, and 1.5 U Expand Long Template Enzyme mix. All primers are listed in Table S8. PCR was performed as follows: 2 min at 94°C, 10 cycles of denaturation at 94°C for 10 s, annealing at 55°C for 30 s, and elongation at 68°C for 4 min; 25 cycles of denaturation at 94°C for 15 s, annealing at 55°C for 30 s, and elongation at 68°C for 4 min. After the last cycle, the samples were incubated for 7 min at 68°C. PCR was performed using a G-Storm GS1 thermal cycler (Gene Technologies Ltd., Essex, UK). Amplification products were excised from the agarose, purified using GeneClean Kit II (QBiogene), cloned into pGEM-T Easy (Promega), and sequenced.

**Relative quantification of transcript.** Total RNA was isolated from roots and leaves of wild-type and transgenic rice plants using Plant RNA Purification Reagent (Invitrogen, Carlsbad, California, USA) and purified using RNeasy Mini Kit (Qiagen, Valencia, California, USA). Approximately 1 µg of total RNA was used for *DNaseI* treatment and cDNA synthesis (using Transcriptor First Strand cDNA Synthesis Kit) as described by the supplier (Roche, Applied Science, Penzberg, Upper Bavaria, Germany). Real-time quantitative RT-PCR (qRT-PCR; LightCycler 480, Roche) was performed using the fluorescent dye SYBR Green (SYBR Select Master Mix, Applied Biosystems) for 40 cycles following the manufacturer's protocol. The transcript level of the *OsNAS2* transgene and endogenous *OsNAAT1* and *OsDMAS1* in transgenic and WT were normalized to the expression level of actin, using the relative standard curve method as previously described<sup>15</sup>. Oligonucleotides ACT1F (5'-CTTCATAGGAATGGAAGCTGCGGGTA-3') and ACT1R (5'-CGACCACCTTGATCTTCATGCTGCTA-3')<sup>62</sup> were used to amplify the actin gene, *OsNAS2*-tg-495F (5'-TCGAGCTCGGTACCTCAG-3') and *OsNAS2*-tg-495R (5'-TGCAAGTGCTGCAAGATG-3') to amplify *OsNAS2*, *OsNAAT1*-103F (5'-CGGACAAGAACACTACTGCGA-3') and *OsNAAT1*-103R (5'-

TTCCTTGCTACCTCTGCCAC-3') to amplify *OsNAAT1*, and *OsDMAS1-126F* (5'-CCCCTTCATCACGTCCAAGC-3') and *OsDMAS1-126R* (5'-ACAGGCCAGTGCACCAGGTA-3') to amplify *OsDMAS1*.

**NA/DMA detection in polished rice grains using liquid chromatography/electrospray ionization time-of-flight mass spectrometry (LC/ESI-TOF-MS).** The LC/ESI-TOF-MS method is based on published methods<sup>57,63</sup> with some modifications. One hundred and fifty polished rice grains were obtained from each line and ground to fine powder. Twenty mg of ground rice was weighed into separate Eppendorf tubes and 1,200  $\mu$ L of sterile distilled water were added to the respective tubes, to release any metal complexed with NA and/or DMA. N  $\epsilon$ -nicotyl-lysine (NL) was used as internal standard. The derivatization of NA and DMA involved mixing of 5  $\mu$ L supernatant (concentrated by evaporation) with 5  $\mu$ L of sodium borate buffer (1 M, pH 8.0) and 5  $\mu$ L of EDTA (50 mM, pH 8.0), followed by the addition of 40  $\mu$ L of FMOC-Cl solution (50 mM) in acetonitrile (CH<sub>3</sub>CN). The reaction mixture was then heated at 60°C for 30 min. Later, the pH of the reaction mixture solution was adjusted to 4.0 using 5  $\mu$ L of 5% formic acid to stop the reaction. Quantification was based on the external calibration curve method using the authentic samples of DMA (2.5–80  $\mu$ M), NA (2.5–80  $\mu$ M) and NL (20  $\mu$ M). LC-ESI-TOF-MS measurement was carried out using a JSM-T100LC AccuTOF (JEOL, Tokyo, Japan) in ESI+ mode. The desolvent temperature was 250°C, the orifice 1 temperature was 80°C and the ESI needle voltage was 2,200 V. The LC separation was performed using a Synergi Hydro RP column (4 $\mu$ m, 80 A, 150  $\times$  2.00 mm; Phenomenex, Torrance, CA, USA) with a solvent of 0.5 % formic acid, 36 % water and 63.5 % CH<sub>3</sub>CN. Using this system, a single run could be completed within 30 min. The detection mass range (m/z) was set from 200 to 1,000.

## References

58. Triglia, T., Peterson, M., Kemp, D. A procedure for in vitro amplification of DNA segments that lie outside the boundaries of known sequences. *Nucl Acids Res.* **16**, 81–86 (1988).
59. Ochman, H., Gerber, a S. & Hartl, D. L. Genetic applications of an inverse polymerase chain reaction. *Genetics* **120**, 621–3 (1988).
60. Liu, Y. G., Mitsukawa, N., Oosumi, T. & Whittier, R. F. Efficient isolation and mapping of *Arabidopsis thaliana* T-DNA insert junctions by thermal asymmetric interlaced PCR. *Plant J.* **8**, 457–63 (1995).
61. Liu, Y. & Huang, N. Efficient amplification of insert end sequences from bacterial artificial chromosome clones by thermal asymmetric interlaced PCR. *Plant Mol. Biol. Rep.* **16**, 175–181 (1998).
62. Li, Q., Sun, S., Yuan, D., Yu, H., Gu, M. & Liu, Q. Validation of candidate reference genes for the accurate normalization of real-time quantitative RT-PCR data in rice during seed development. *Plant Mol. Biol. Rep.* **28**, 49-57 (2010).
63. Wada, Y., Yamaguchi, I., Takahashi, M., Nakanishi, H., Mori, S., & Nishizawa, N. K. Highly sensitive quantitative analysis of nicotine using LC/ESI-TOF-MS with an internal standard. *Bioscience, Biotechnology, and Biochemistry* **71**, 435–441 (2007).
